# Supplementary material for: Relationship between cerebral aneurysms and variations in cerebral basal arterial network: a morphometric cross-sectional study in Computed Tomography Angiograms from a neurointerventional unit
Source: HighWire-hosted journal article supplement (doi:10.1136/bmjopen-2021-051028), 2021-09-01
Supplement: bmjopen-2021-051028supp003_data_supplement.pdf [file bmjopen-2021-051028supp003_data_supplement.pdf]

**Supplementary Table 1: Comparing averages of individual averages and averages of individual standard deviations of the relative sizes of components of CBAN of 81 individuals that have complete data with 64 of those who had missing measurements of P1, or AcomA measurements.**

|           | Individual averages | Individual Std. Dev. |
|-----------|---------------------|----------------------|
| Average   | 0.99661246          | 0.34829138           |
| Std. Dev. | 0.02189848          | 0.10008849           |
| Count (N) | 64                  | 64                   |
|           |                     |                      |
| Average   | 0.9959641           | 0.36482336           |
| Std. Dev. | 0.01402553          | 0.08525546           |
| Count (N) | 81                  | 81                   |
|           |                     |                      |

CBAN = cerebral basal arterial network, P1 = first segment of posterior cerebral artery, AcomA = anterior communicating artery, Std. Dev. = standard deviations. Averages: 0.9960 for N=81 (Std. Dev. = 0.0140) and 0.9966 for N=64 (Std. Dev. = 0.0219),  $t = 0.20$ ; Standard deviations: 0.3648 for N=81 (Std. Dev. = 0.0853) and 0.3483 for N=64 (Std. Dev. = 0.1000),  $t = 1.07$ .
