# Supplementary material for: Relationship between cerebral aneurysms and variations in cerebral basal arterial network: a morphometric cross-sectional study in Computed Tomography Angiograms from a neurointerventional unit
Source: HighWire-hosted journal article supplement (doi:10.1136/bmjopen-2021-051028), 2021-09-01
Supplement: bmjopen-2021-051028supp007_data_supplement.pdf [file bmjopen-2021-051028supp007_data_supplement.pdf]

|  | A | B | C | D | E | F | G | H | I | J | K | L | M | N | O | P | Q | R | S | T | U | V | W | X | Y | Z | [aa] | [ab] | [ac] | [ad] | [ae] | [af] | [ag] | [ah] | [ai] | [aj] | [ak] | [al] | [am] | [an] | [ao] | [ap] | [aq] | [ar] | [as] | [at] | [au] | [av] | [aw] | [ax] | [ay] | [az] | [ba] | [bb] | [bc] | [bd] | [be] | [bf] | [bg] | [bh] | [bi] | [bj] | [bk] | [bl] | [bm] | [bn] | [bo] | [bp] | [bq] | [br] | [bs] | [bt] | [bu] | [bv] | [bw] | [bx] | [by] | [bz] | [ca] | [cb] | [cc] | [cd] | [ce] | [cf] | [cg] | [ch] | [ci] | [cj] | [ck] | [cl] | [cm] | [cn] | [co] | [cp] | [cq] | [cr] | [cs] | [ct] | [cu] | [cv] | [cw] | [cx] | [cy] | [cz] | [da] | [db] | [dc] | [dd] | [de] | [df] | [dg] | [dh] | [di] | [dj] | [dk] | [dl] | [dm] | [dn] | [do] | [dp] | [dq] | [dr] | [ds] | [dt] | [du] | [dv] | [dw] | [dx] | [dy] | [dz] | [ea] | [eb] | [ec] | [ed] | [ee] | [ef] | [eg] | [eh] | [ei] | [ej] | [ek] | [el] | [em] | [en] | [eo] | [ep] | [eq] | [er] | [es] | [et] | [eu] | [ev] | [ew] | [ex] | [ey] | [ez] | [fa] | [fb] | [fc] | [fd] | [fe] | [ff] | [fg] | [fh] | [fi] | [fj] | [fk] | [fl] | [fm] | [fn] | [fo] | [fp] | [fq] | [fr] | [fs] | [ft] | [fu] | [fv] | [fw] | [fx] | [fy] | [fz] | [ga] | [gb] | [gc] | [gd] | [ge] | [gf] | [gg] | [gh] | [gi] | [gj] | [gk] | [gl] | [gm] | [gn] | [go] | [gp] | [gq] | [gr] | [gs] | [gt] | [gu] | [gv] | [gw] | [gx] | [gy] | [gz] | [ha] | [hb] | [hc] | [hd] | [he] | [hf] | [hg] | [hh] | [hi] | [hj] | [hk] | [hl] | [hm] | [hn] | [ho] | [hp] | [hq] | [hr] | [hs] | [ht] | [hu] | [hv] | [hw] | [hx] | [hy] | [hz] | [ia] | [ib] | [ic] | [id] | [ie] | [if] | [ig] | [ih] | [ii] | [ij] | [ik] | [il] | [im] | [in] | [io] | [ip] | [iq] | [ir] | [is] | [it] | [iu] | [iv] | [iw] | [ix] | [iy] | [iz] | [ja] | [jb] | [jc] | [jd] | [je] | [jf] | [jg] | [jh] | [ji] | [jj] | [jk] | [jl] | [jm] | [jn] | [jo] | [jp] | [jq] | [jr] | [js] | [jt] | [ju] | [jv] | [jw] | [jx] | [jy] | [jz] | [ka] | [kb] | [kc] | [kd] | [ke] | [kf] | [kg] | [kh] | [ki] | [kj] | [kk] | [kl] | [km] | [kn] | [ko] | [kp] | [kq] | [kr] | [ks] | [kt] | [ku] | [kv] | [kw] | [kx] | [ky] | [kz] | [la] | [lb] | [lc] | [ld] | [le] | [lf] | [lg] | [lh] | [li] | [lj] | [lk] | [ll] | [lm] | [ln] | [lo] | [lp] | [lq] | [lr] | [ls] | [lt] | [lu] | [lv] | [lw] | [lx] | [ly] | [lz] | [ma] | [mb] | [mc] | [md] | [me] | [mf] | [mg] | [mh] | [mi] | [mj] | [mk] | [ml] | [mm] | [mn] | [mo] | [mp] | [mq] | [mr] | [ms] | [mt] | [mu] | [mv] | [mw] | [mx] | [my] | [mz] | [na] | [nb] | [nc] | [nd] | [ne] | [nf] | [ng] | [nh] | [ni] | [nj] | [nk] | [nl] | [nm] | [nn] | [no] | [np] | [nq] | [nr] | [ns] | [nt] | [nu] | [nv] | [nw] | [nx] | [ny] | [nz] | [oa] | [ob] | [oc] | [od] | [oe] | [of] | [og] | [oh] | [oi] | [oj] | [ok] | [ol] | [om] | [on] | [oo] | [op] | [oq] | [or] | [os] | [ot] | [ou] | [ov] | [ow] | [ox] | [oy] | [oz] | [pa] | [pb] | [pc] | [pd] | [pe] | [pf] | [pg] | [ph] | [pi] | [pj] | [pk] | [pl] | [pm] | [pn] | [po] | [pp] | [pq] | [pr] | [ps] | [pt] | [pu] | [pv] | [pw] | [px] | [py] | [pz] | [qa] | [qb] | [qc] | [qd] | [qe] | [qf] | [qg] | [qh] | [qi] | [qj] | [qk] | [ql] | [qm] | [qn] | [qo] | [qp] | [qq] | [qr] | [qs] | [qt] | [qu] | [qv] | [qw] | [qx] | [qy] | [qz] | [ra] | [rb] | [rc] | [rd] | [re] | [rf] | [rg] | [rh] | [ri] | [rj] | [rk] | [rl] | [rm] | [rn] | [ro] | [rp] | [rq] | [rr] | [rs] | [rt] | [ru] | [rv] | [rw] | [rx] | [ry] | [rz] | [sa] | [sb] | [sc] | [sd] | [se] | [sf] | [sg] | [sh] | [si] | [sj] | [sk] | [sl] | [sm] | [sn] | [so] | [sp] | [sq] | [sr] | [ss] | [st] | [su] | [sv] | [sw] | [sx] | [sy] | [sz] | [ta] | [tb] | [tc] | [td] | [te] | [tf] | [tg] | [th] | [ti] | [tj] | [tk] | [tl] | [tm] | [tn] | [to] | [tp] | [tq] | [tr] | [ts] | [tt] | [tu] | [tv] | [tw] | [tx] | [ty] | [tz] | [ua] | [ub] | [uc] | [ud] | [ue] | [uf] | [ug] | [uh] | [ui] | [uj] | [uk] | [ul] | [um] | [un] | [uo] | [up] | [uq] | [ur] | [us] | [ut] | [uu] | [uv] | [uw] | [ux] | [uy] | [uz] | [va] | [vb] | [vc] | [vd] | [ve] | [vf] | [vg] | [vh] | [vi] | [vj] | [vk] | [vl] | [vm] | [vn] | [vo] | [vp] | [vq] | [vr] | [vs] | [vt] | [vu] | [vv] | [vw] | [vx] | [vy] | [vz] | [wa] | [wb] | [wc] | [wd] | [we] | [wf] | [wg] | [wh] | [wi] | [wj] | [wk] | [wl] | [wm] | [wn] | [wo] | [wp] | [wq] | [wr] | [ws] | [wt] | [wu] | [wv] | [ww] | [wx] | [wy] | [wz] | [xa] | [xb] | [xc] | [xd] | [xe] | [xf] | [xg] | [yh] | [yi] | [yj] | [yk] | [yl] | [ym] | [yn] | [yo] | [yp] | [yq] | [yr] | [ys] | [yt] | [yu] | [yv] | [yw] | [yx] | [yy] | [yz] | [za] | [zb] | [zc] | [zd] | [ze] | [zf] | [zg] | [zh] | [zi] | [zj] | [zk] | [zl] | [zm] | [zn] | [zo] | [zp] | [zq] | [zr] | [zs] | [zt] | [zu] | [zv] | [zw] | [zx] | [zy] | [zz] | [Aa] |
|--|---|---|---|---|---|---|---|---|---|---|---|---|---|---|---|---|---|---|---|---|---|---|---|---|---|---|------|------|------|------|------|------|------|------|------|------|------|------|------|------|------|------|------|------|------|------|------|------|------|------|------|------|------|------|------|------|------|------|------|------|------|------|------|------|------|------|------|------|------|------|------|------|------|------|------|------|------|------|------|------|------|------|------|------|------|------|------|------|------|------|------|------|------|------|------|------|------|------|------|------|------|------|------|------|------|------|------|------|------|------|------|------|------|------|------|------|------|------|------|------|------|------|------|------|------|------|------|------|------|------|------|------|------|------|------|------|------|------|------|------|------|------|------|------|------|------|------|------|------|------|------|------|------|------|------|------|------|------|------|------|------|------|------|------|------|------|------|------|------|------|------|------|------|------|------|------|------|------|------|------|------|------|------|------|------|------|------|------|------|------|------|------|------|------|------|------|------|------|------|------|------|------|------|------|------|------|------|------|------|------|------|------|------|------|------|------|------|------|------|------|------|------|------|------|------|------|------|------|------|------|------|------|------|------|------|------|------|------|------|------|------|------|------|------|------|------|------|------|------|------|------|------|------|------|------|------|------|------|------|------|------|------|------|------|------|------|------|------|------|------|------|------|------|------|------|------|------|------|------|------|------|------|------|------|------|------|------|------|------|------|------|------|------|------|------|------|------|------|------|------|------|------|------|------|------|------|------|------|------|------|------|------|------|------|------|------|------|------|------|------|------|------|------|------|------|------|------|------|------|------|------|------|------|------|------|------|------|------|------|------|------|------|------|------|------|------|------|------|------|------|------|------|------|------|------|------|------|------|------|------|------|------|------|------|------|------|------|------|------|------|------|------|------|------|------|------|------|------|------|------|------|------|------|------|------|------|------|------|------|------|------|------|------|------|------|------|------|------|------|------|------|------|------|------|------|------|------|------|------|------|------|------|------|------|------|------|------|------|------|------|------|------|------|------|------|------|------|------|------|------|------|------|------|------|------|------|------|------|------|------|------|------|------|------|------|------|------|------|------|------|------|------|------|------|------|------|------|------|------|------|------|------|------|------|------|------|------|------|------|------|------|------|------|------|------|------|------|------|------|------|------|------|------|------|------|------|------|------|------|------|------|------|------|------|------|------|------|------|------|------|------|------|------|------|------|------|------|------|------|------|------|------|------|------|------|------|------|------|------|------|------|------|------|------|------|------|------|------|------|------|------|------|------|------|------|------|------|------|------|------|------|------|------|------|------|------|------|------|------|------|------|------|------|------|------|------|------|------|------|------|------|------|------|------|------|------|------|------|------|------|------|------|------|------|------|------|------|------|------|------|------|------|------|------|------|------|------|------|------|------|------|------|------|------|------|------|------|------|------|------|------|------|------|------|------|------|------|------|------|------|------|------|------|------|------|------|------|------|------|------|------|------|------|------|------|------|------|------|------|------|------|------|------|------|------|------|------|------|------|------|------|------|------|------|------|------|------|------|------|------|------|------|------|------|------|------|------|------|------|------|------|------|------|------|------|------|------|------|------|------|------|------|------|------|------|------|------|
|--|---|---|---|---|---|---|---|---|---|---|---|---|---|---|---|---|---|---|---|---|---|---|---|---|---|---|------|------|------|------|------|------|------|------|------|------|------|------|------|------|------|------|------|------|------|------|------|------|------|------|------|------|------|------|------|------|------|------|------|------|------|------|------|------|------|------|------|------|------|------|------|------|------|------|------|------|------|------|------|------|------|------|------|------|------|------|------|------|------|------|------|------|------|------|------|------|------|------|------|------|------|------|------|------|------|------|------|------|------|------|------|------|------|------|------|------|------|------|------|------|------|------|------|------|------|------|------|------|------|------|------|------|------|------|------|------|------|------|------|------|------|------|------|------|------|------|------|------|------|------|------|------|------|------|------|------|------|------|------|------|------|------|------|------|------|------|------|------|------|------|------|------|------|------|------|------|------|------|------|------|------|------|------|------|------|------|------|------|------|------|------|------|------|------|------|------|------|------|------|------|------|------|------|------|------|------|------|------|------|------|------|------|------|------|------|------|------|------|------|------|------|------|------|------|------|------|------|------|------|------|------|------|------|------|------|------|------|------|------|------|------|------|------|------|------|------|------|------|------|------|------|------|------|------|------|------|------|------|------|------|------|------|------|------|------|------|------|------|------|------|------|------|------|------|------|------|------|------|------|------|------|------|------|------|------|------|------|------|------|------|------|------|------|------|------|------|------|------|------|------|------|------|------|------|------|------|------|------|------|------|------|------|------|------|------|------|------|------|------|------|------|------|------|------|------|------|------|------|------|------|------|------|------|------|------|------|------|------|------|------|------|------|------|------|------|------|------|------|------|------|------|------|------|------|------|------|------|------|------|------|------|------|------|------|------|------|------|------|------|------|------|------|------|------|------|------|------|------|------|------|------|------|------|------|------|------|------|------|------|------|------|------|------|------|------|------|------|------|------|------|------|------|------|------|------|------|------|------|------|------|------|------|------|------|------|------|------|------|------|------|------|------|------|------|------|------|------|------|------|------|------|------|------|------|------|------|------|------|------|------|------|------|------|------|------|------|------|------|------|------|------|------|------|------|------|------|------|------|------|------|------|------|------|------|------|------|------|------|------|------|------|------|------|------|------|------|------|------|------|------|------|------|------|------|------|------|------|------|------|------|------|------|------|------|------|------|------|------|------|------|------|------|------|------|------|------|------|------|------|------|------|------|------|------|------|------|------|------|------|------|------|------|------|------|------|------|------|------|------|------|------|------|------|------|------|------|------|------|------|------|------|------|------|------|------|------|------|------|------|------|------|------|------|------|------|------|------|------|------|------|------|------|------|------|------|------|------|------|------|------|------|------|------|------|------|------|------|------|------|------|------|------|------|------|------|------|------|------|------|------|------|------|------|------|------|------|------|------|------|------|------|------|------|------|------|------|------|------|------|------|------|------|------|------|------|------|------|------|------|------|------|------|------|------|------|------|------|------|------|------|------|------|------|------|------|------|------|------|------|------|------|------|------|------|------|------|------|------|------|------|------|------|------|------|------|------|------|------|------|------|------|------|------|------|------|------|------|------|------|------|------|------|------|------|------|------|------|
